# Supplementary material for: CTCF Expression and Dynamic Motif Accessibility Modulates Epithelial–Mesenchymal Gene Expression
Source: MDPI journal article supplement (doi:10.3390/cancers14010209), 2022-01-01
Supplement: s1 [file s1]

## Article

# CTCF Expression and Dynamic Motif Accessibility Modulates Epithelial–Mesenchymal Gene Expression

Kelsey S. Johnson <sup>1</sup>, Shaimaa Hussein <sup>2</sup>, Priyanka Chakraborty <sup>3</sup>, Arvind Muruganantham <sup>1</sup>, Sheridan Mikhail <sup>1</sup>, Giovanni Gonzalez <sup>1</sup>, Shuxuan Song <sup>1</sup>, Mohit Kumar Jolly <sup>3</sup>, Michael J. Toneff <sup>4</sup>, Mary Lauren Benton <sup>5</sup>, Yin C. Lin <sup>2</sup> and Joseph H. Taube <sup>1,6,\*</sup>

<sup>1</sup> Department of Biology, Baylor University, Waco, TX 76706, USA; kelsey\_johnson1@baylor.edu (K.S.J.); arvind\_muruganantha1@baylor.edu (A.M.); sheridan\_mikhail1@baylor.edu (S.M.); giovanny\_gonzalez1@alumni.baylor.edu (G.G.); shuxuan\_song1@baylor.edu (S.S.)

<sup>2</sup> Baylor Institute for Immunology Research, Baylor Scott & White, Dallas, 75246 TX, USA; Shaimaa.zaki@gmail.com (S.H.); lynchunyin@gmail.com (Y.C.L.)

<sup>3</sup> Centre for BioSystems Science and Engineering, Indian Institute of Science, Bangalore 560012, India; priyanka08993@gmail.com (P.C.); mkjolly@iisc.ac.in (M.K.J.)

<sup>4</sup> Department of Biology, Widener University, Chester, PA 19013, USA; mtoneff@widener.edu

<sup>5</sup> Department of Computer Science, Baylor University, Waco TX, 76706, USA; marylauren\_benton@baylor.edu

<sup>6</sup> Dan L. Duncan Cancer Center, Houston, TX, USA

\* Correspondence: [joseph.taube@baylor.edu](mailto:joseph.taube@baylor.edu)

## Supplementary

**A**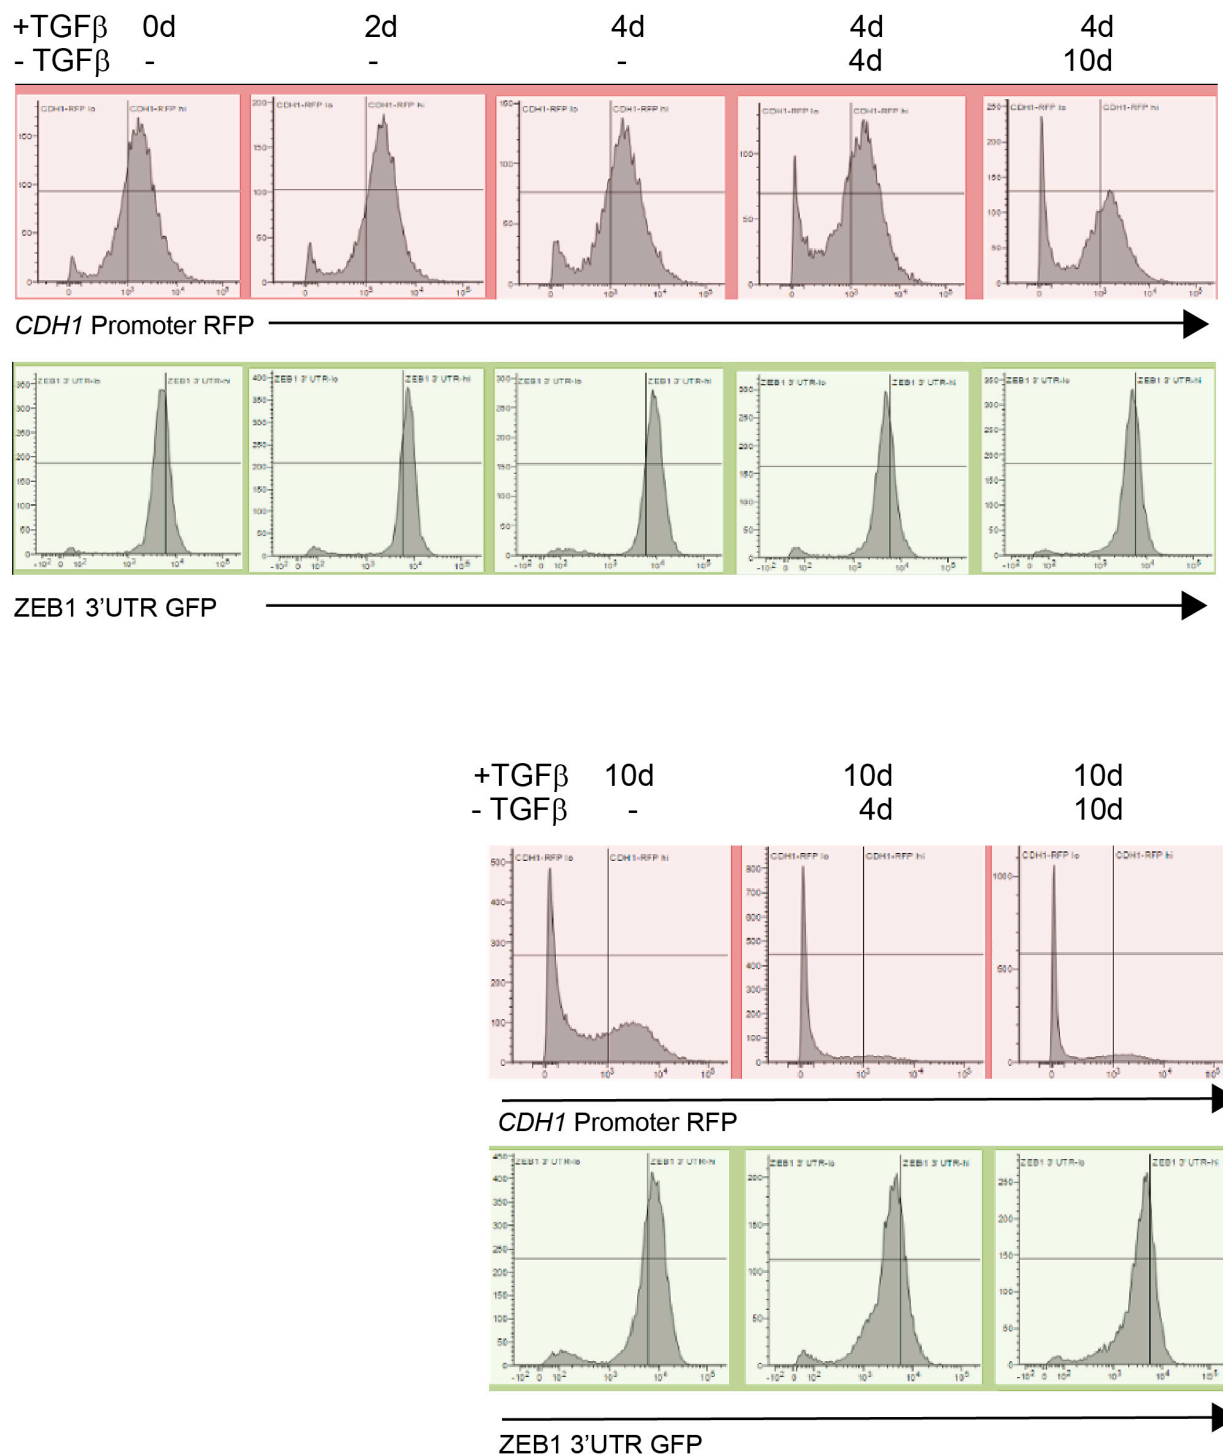

**Figure S1.** TGF $\beta$  treatment suppresses *CDH1* promoter reporter activity and increases ZEB1 3'UTR reporter activity. **(A)** FACS profiling of ZEB1 3' UTR reporter and *CDH1* promoter reporter activity. FACS quantification for Z1-GFP reporter (green panel), *CDH1*-RFP reporter (pink panel).

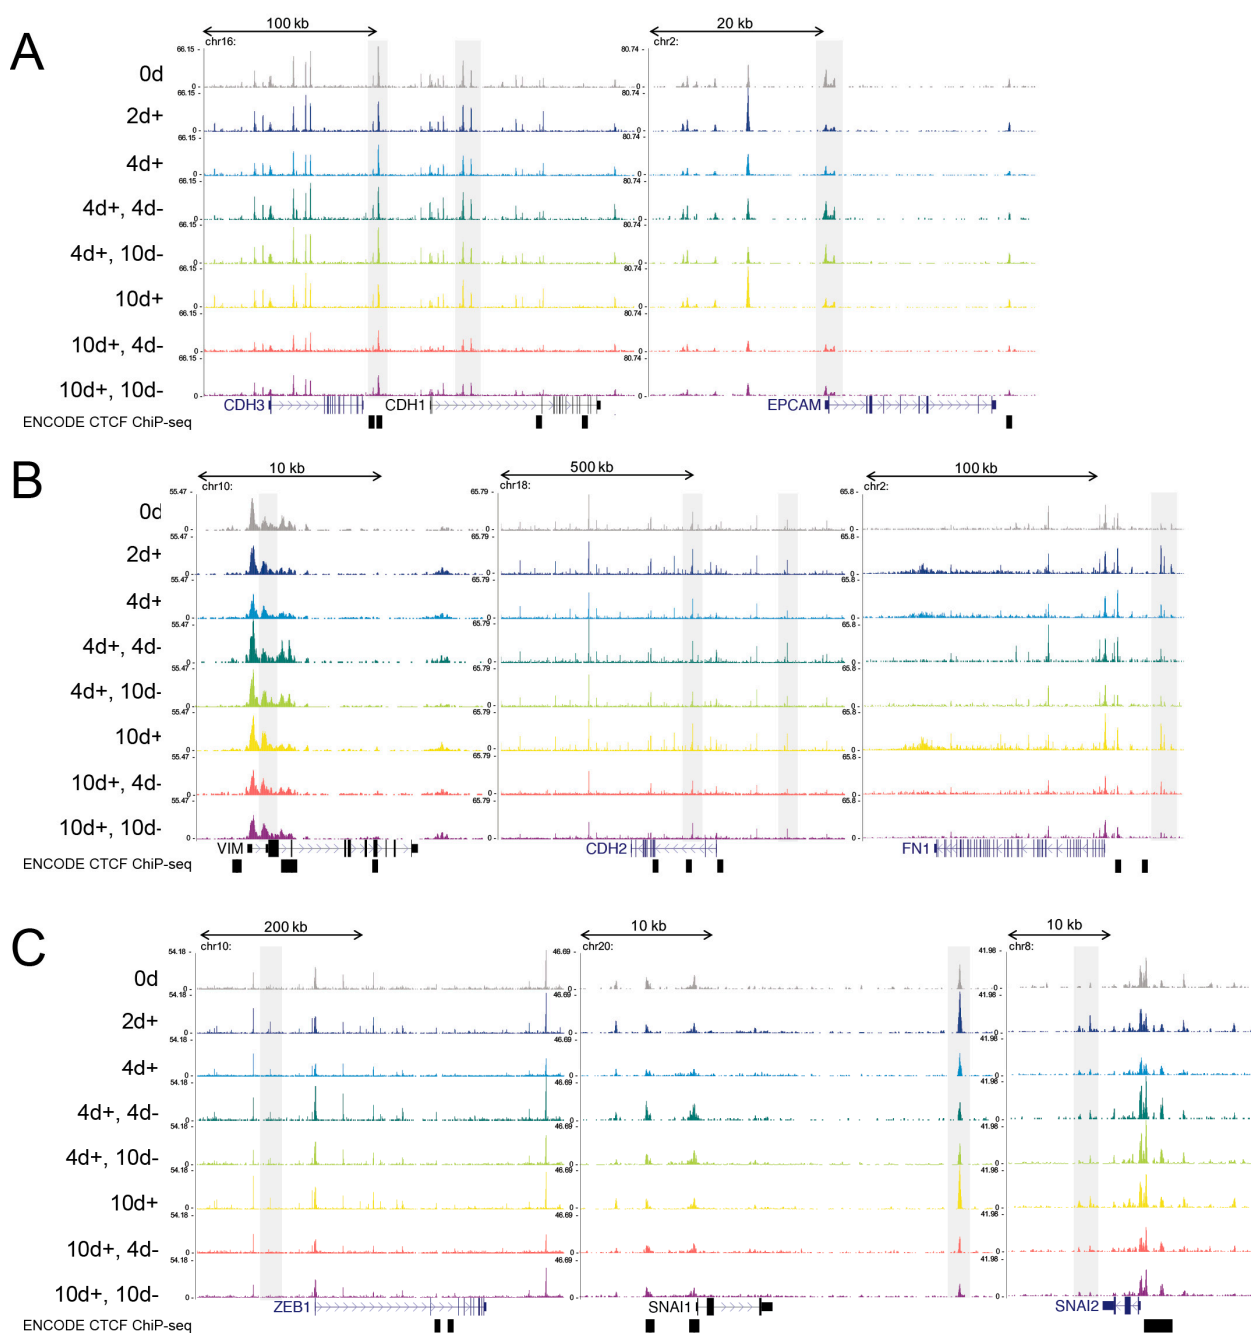

**Figure S2.** Dynamics of TGF $\beta$ -induced and TGF $\beta$ -withdrawn chromatin accessibility. ATAC-seq peak profiles of select (A) epithelial (*CDH3*, *CDH1*, and *EPCAM*), (B) mesenchymal (*VIM*, *CDH2*, and *FN1*), and (C) EMT-TF (*ZEB1*, *SNAI1*, and *SNAI2*) genes at indicated short-term (top) and long-term (bottom) TGF $\beta$  treatment models ( $n = 2$ ). Black rectangles below genes refer to ENCODE CTCF ChIP-seq peaks in human mammary epithelial cells (HMEC).

Table 1

| Hallmark Gene Sets |                                          |
|--------------------|------------------------------------------|
| 1                  | UV Response DN                           |
| 2                  | Estrogen Response Early                  |
| 3                  | Epithelial mesenchymal transition        |
| 4                  | TNF $\alpha$ Signaling via NF $\kappa$ B |
| 5                  | Apoptosis                                |
| 6                  | IL2 STAT5 Signaling                      |
| 7                  | Hypoxia                                  |
| 8                  | Mitotic Spindle                          |
| 9                  | TGF $\beta$ Signaling                    |
| 10                 | Androgen Response                        |
| 11                 | Inflammatory Response                    |
| 12                 | Hedgehog Signaling                       |
| 13                 | Apical Junction                          |
| 14                 | p53 Pathway                              |
| 15                 | Xenobiotic Metabolism                    |
| 16                 | KRAS Signaling Up                        |

Table 2

| Breast and Mammary-Specific Gene Sets    | Study                 |
|------------------------------------------|-----------------------|
| A Mammary Stem Cell Up                   | Lim et al., 2010      |
| B Luminal vs Mesenchymal Down            | Charafe et al., 2006  |
| C Luminal vs Basal Down                  | Charafe et al., 2006  |
| D Pubertal Breast 4/5wk Up               | McBryan et al., 2007  |
| E Basal vs Luminal                       | Farmer et al., 2005   |
| F Luminal B Down                         | Smid et al., 2008     |
| G Pubertal Breast 3/4wk Up               | McBryan et al., 2007  |
| H Basal Up                               | Smid et al., 2008     |
| I Invasive Breast Cancer Down            | Poola et al., 2005    |
| J Breast Cancer Relapse in Bone Down     | Smid et al., 2008     |
| K Ductal Invasive Up                     | Schuetz et al., 2006  |
| O Basal Down                             | Smid et al., 2008     |
| L Medullary vs Ductal Breast Cancer Down | Bertucci et al., 2006 |
| M Luminal Mature Down                    | Lim et al., 2010      |
| N Ductal Invasive Down                   | Schuetz et al., 2006  |
| P ESR1 Laser Up                          | Yang et al., 2006     |
| Q Copy Number Down                       | Climent et al., 2007  |
| R Luminal vs Basal Up                    | Charafe et al., 2006  |

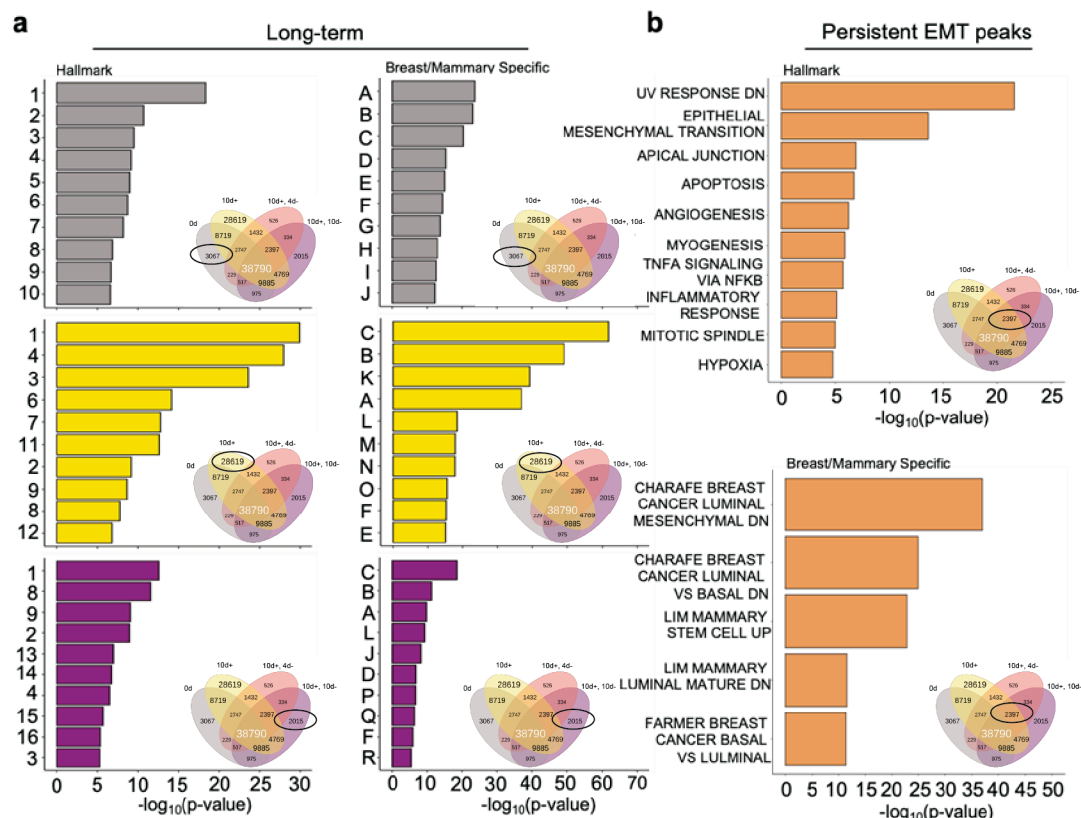

**Figure S3.** EMT, mammary basal cell, and stemness gene sets are enriched in TGF $\beta$ -induced and persistent peaks. (Table 1) Number key for GSEA MSigDB hits for Hallmark gene sets. (Table 2) Letter key for GSEA MSigDB hits for breast and mammary-specific gene sets. **(A)** GSEA MSigDB hits (based on number key in Table 1) for ATAC peaks in Hallmarks gene sets (left) and hits (based on letter key in Table 2) for breast and mammary-specific gene sets (right) in long-term TGF $\beta$ -induced and -withdrawn conditions. Gray = 0d; yellow = 10d + TGF $\beta$ ; purple = 10d + TGF $\beta$ , 10d - TGF $\beta$ . **(B)** GSEA MSigDB hits for genes annotated to ATAC peaks with persistent chromatin alterations following TGF $\beta$  treatment and withdrawal in Hallmarks gene sets (top) and breast and mammary-specific gene sets (bottom).

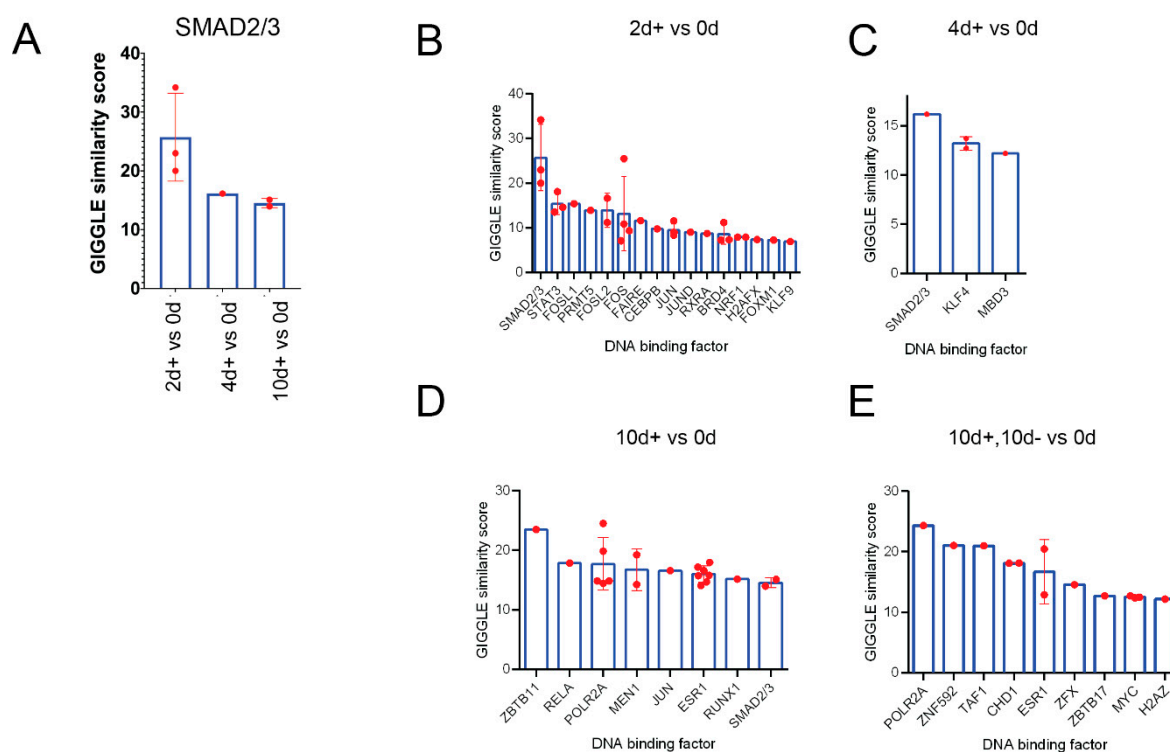

**Figure S4.** GIGGLE similarity scores of probable chromatin accessibility regulators at various stages of the EMT-MET spectrum in breast-specific cell lines. Peaks enriched at the indicated timepoints vs untreated cells were compared to genome interval files. (A) SMAD2/3-associated genome interval files show a diminished score as EMT progresses. (B–E) All scoring genome interval files for the indicated timepoint comparisons are shown. Data points refer to independent genome interval files queried by GIGGLE.

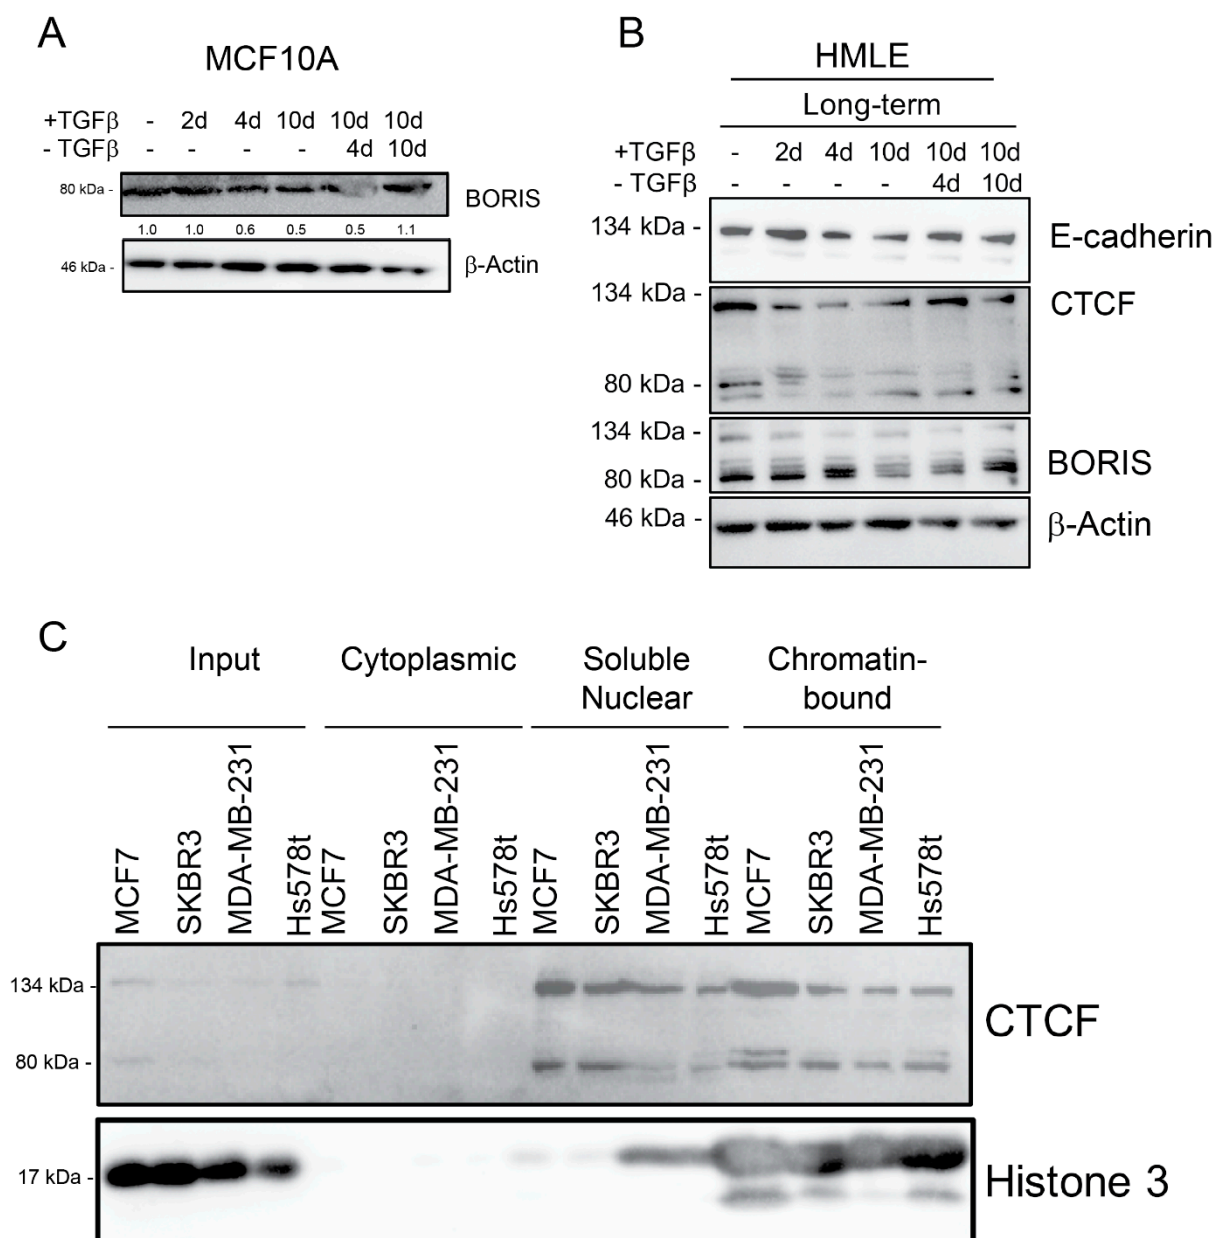

**Figure S5.** EMT suppresses total CTCF protein levels. **(A)** Western blot for BORIS in treated MCF10A cells. **(B)** Western blot for E-cadherin, CTCF, and BORIS in HMLE cell lines treated with (or withdrawn from) 5 ng/mL TGFβ at the indicated time. **(C)** Western blot for CTCF localization in specified cell fractions in the specified breast cancer cell lines.

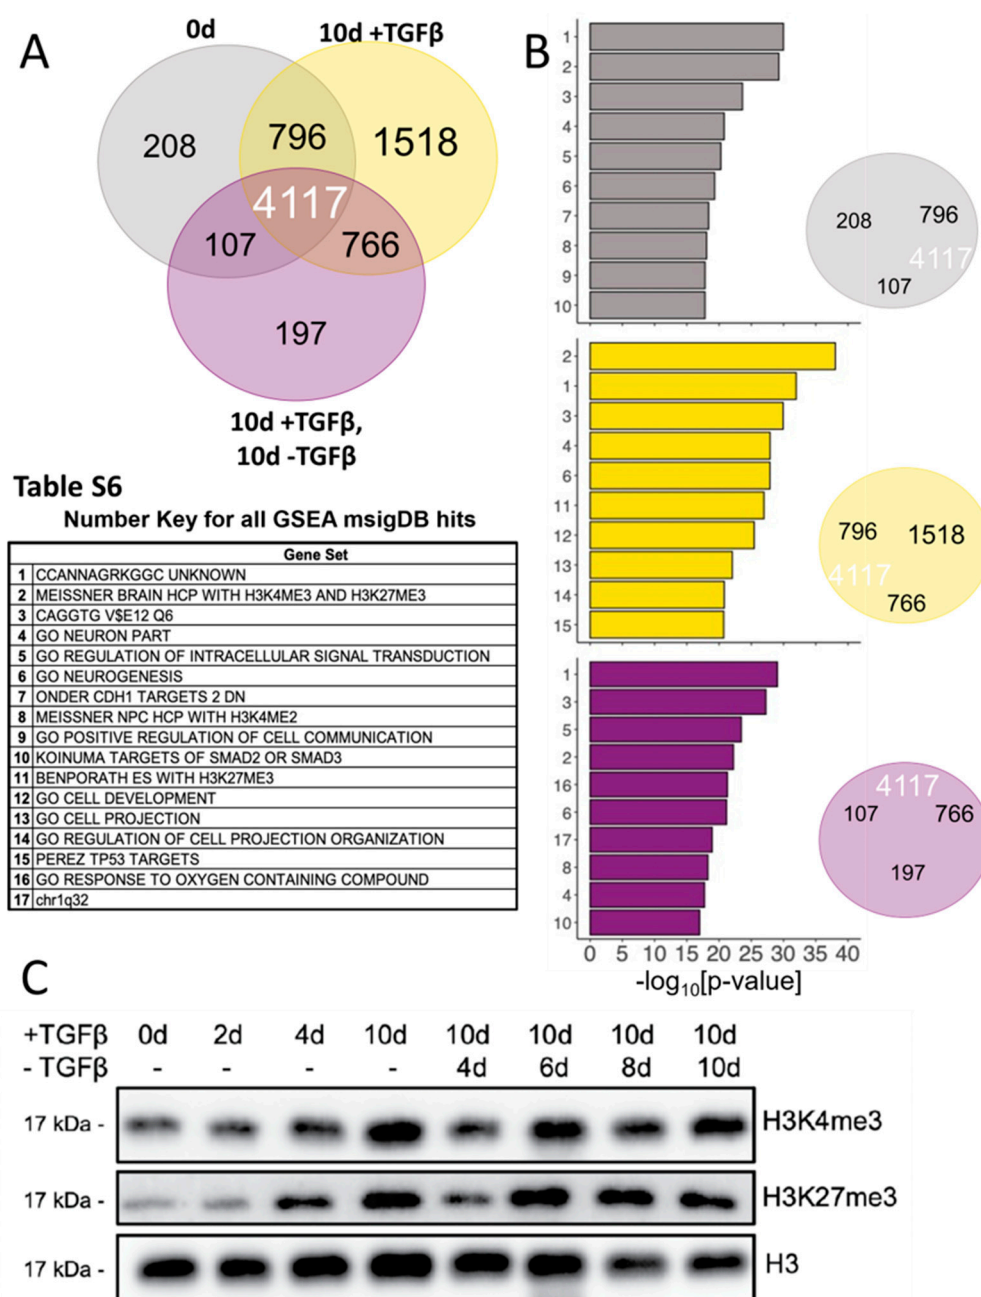

**Figure S6.** Genes near accessible CTCF motifs are enriched for bivalent, neuronal, and signal transduction genes. **(A)** Venn diagram representing the number of genes adjacent to accessible CTCF motifs at the indicated timepoints. **(Table S6)** GSEA MSigDB gene sets determined to be highly-enriched in accessible CTCF motifs. **(B)** GSEA MSigDB enrichment (based on number key in Table S6) for top-10 enriched gene sets by condition circled in venn diagram to the right. **(C)** Western blot for histone modification changes in treated MCF10A cells.



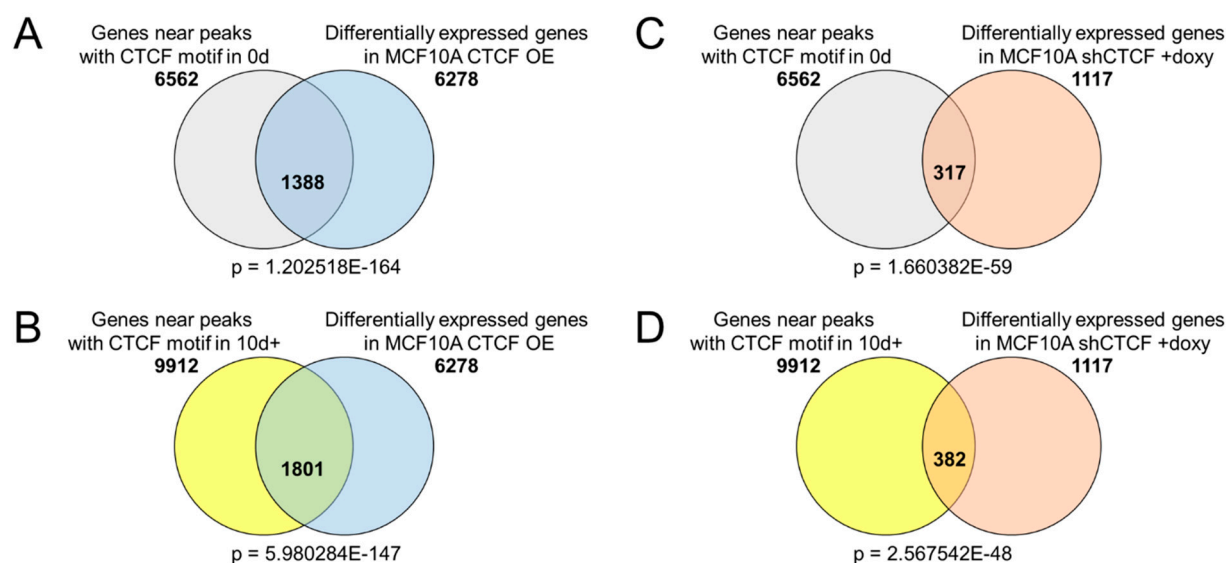

**Figure S7.** Change in gene expression upon CTCF manipulation in MCF10A cells overlap with genes nearby to accessible chromatin with CTCF motifs. Overlap between genes differentially expressed in CTCF overexpression MCF10A cells (blue-A,B) or in CTCF knockdown MCF10A cells (red-C,D) and the set of genes nearest to ATAC-seq peaks containing a CTCF motif from either the untreated MCF10A cells (gray-A,C) or MCF10A cells treated with TGF $\beta$  for 10 days (yellow-B,D).  $p$ -value calculated using a hypergeometric test.
